# Supplementary material for: Non-bleached colonies of massive Porites may attract fishes for selective grazing during mass bleaching events
Source: PeerJ. 2017 Jun 30;5:e3470. doi: 10.7717/peerj.3470 (PMC5494163; doi:10.7717/peerj.3470)
Supplement: Supplemental Information 1 [file peerj-05-3470-s001.xlsx]

## Sheet: Data1
ID	size	scar	depth(m)	bleach	point1	point2
1	2	0	8	N	simogu	sekisei
1	3	2	8	N	simogu	sekisei
1	3	0	7	Y	simogu	sekisei
1	3	0	7	N	simogu	sekisei
1	2	0	7	N	simogu	sekisei
1	2	0	7	N	simogu	sekisei
1	2	3	8	N	simogu	sekisei
1	5	0	8	Y	simogu	sekisei
1	1	0	9	Y	simogu	sekisei
1	2	0	9	Y	simogu	sekisei
1	2	1	9	N	simogu	sekisei
1	2	1	10	N	simogu	sekisei
1	2	3	10	N	simogu	sekisei
1	2	0	10	Y	simogu	sekisei
1	2	0	10	Y	simogu	sekisei
1	2	1	10	N	simogu	sekisei
1	2	0	10	Y	simogu	sekisei
1	3	0	10	N	simogu	sekisei
1	2	0	9	Y	simogu	sekisei
1	2	1	1	N	simogu	sekisei
1	3	0	9	N	simogu	sekisei
1	3	2	10	N	simogu	sekisei
1	1	2	9	Y	simogu	sekisei
1	1	0	8	N	simogu	sekisei
1	2	2	7	N	simogu	sekisei
1	2	2	8	N	simogu	sekisei
1	2	0	7	N	simogu	sekisei
1	2	1	8	N	simogu	sekisei
1	4	3	8	N	simogu	sekisei
1	4	3	8	N	simogu	sekisei
1	2	2	2	N	simouchi	sekisei
1	2	0	5	N	marugu	sekisei
1	1	1	3	N	marugu	sekisei
1	3	1	4	N	marugu	sekisei
1	2	0	2	N	kurosima	sekisei
1	2	0	3	N	kurosima	sekisei
1	2	0	3	Y	kurosima	sekisei
1	3	0	2	N	kurosima	sekisei
1	3	2	6	N	panariino	sekisei
1	2	0	6	N	panariino	sekisei
1	3	0	5	Y	panariino	sekisei
1	2	1	5	Y	panariino	sekisei
1	2	0	5	Y	panariino	sekisei
1	2	1	4	Y	panariino	sekisei
1	2	0	4	N	panariino	sekisei
1	2	1	7	N	panariino	sekisei
1	1	3	8	N	panariino	sekisei
1	2	1	8	N	panariino	sekisei
1	3	2	8	N	panariino	sekisei
1	3	3	8	N	panariino	sekisei
1	3	1	8	N	panariino	sekisei
1	3	1	8	N	panariino	sekisei
1	4	2	8	N	panariino	sekisei
1	1	1	7	N	panariino	sekisei
1	5	1	4	Y	panariino	sekisei
1	4	1	4	Y	panariino	sekisei
1	3	1	6	N	panariino	sekisei
1	4	0	6	Y	panariino	sekisei
1	1	2	6	N	panariino	sekisei
1	5	1	4	Y	panariino	sekisei
1	5	1	4	N	panariino	sekisei
1	4	2	4	N	panariino	sekisei
1	1	2	3	Y	panariino	sekisei
1	2	1	4	N	panariino	sekisei
1	2	3	5	N	panariino	sekisei
1	2	1	5	N	panariino	sekisei
1	3	1	5	Y	panariino	sekisei
1	2	2	5	N	panariino	sekisei
1	3	0	5	N	panariino	sekisei
1	3	2	4	N	panariino	sekisei
1	4	2	3	Y	panariino	sekisei
1	2	1	4	Y	panariino	sekisei
1	3	1	5	N	panariino	sekisei
1	2	2	6	N	panariino	sekisei
1	2	1	5	N	panariino	sekisei
1	2	2	5	N	panariino	sekisei
1	2	1	6	N	sai7	sekisei
1	3	0	7	Y	sai7	sekisei
1	3	1	5	N	sai7	sekisei
1	2	1	5	N	sai7	sekisei
1	2	0	6	N	sai7	sekisei
1	4	1	4	N	sai7	sekisei
1	2	1	5	N	sai7	sekisei
1	2	0	5	N	sai7	sekisei
1	2	2	10	N	St.N	sekisei
1	2	1	10	N	St.N	sekisei
1	2	0	10	Y	St.N	sekisei
1	3	0	10	N	St.N	sekisei
1	2	0	10	Y	St.N	sekisei
1	2	0	11	Y	St.N	sekisei
1	2	0	11	Y	St.N	sekisei
1	1	0	11	Y	St.N	sekisei
1	2	0	11	N	St.N	sekisei
1	2	1	11	N	St.N	sekisei
1	2	1	10	N	St.N	sekisei
1	1	1	11	N	St.N	sekisei
1	2	2	11	N	St.N	sekisei
1	3	1	10	N	St.N	sekisei
1	2	1	10	N	St.N	sekisei
1	3	0	10	N	St.N	sekisei
1	2	0	10	Y	St.N	sekisei
1	3	3	10	N	St.N	sekisei
1	2	2	10	N	St.N	sekisei
1	2	1	10	N	St.N	sekisei
1	3	2	10	N	St.N	sekisei
1	2	0	10	Y	St.N	sekisei
1	2	1	10	N	St.N	sekisei
1	2	1	11	N	St.N	sekisei
1	2	1	11	N	St.N	sekisei
1	2	2	11	N	St.N	sekisei
1	1	1	11	N	St.N	sekisei
1	1	1	11	N	St.N	sekisei
1	2	1	11	N	St.N	sekisei
1	2	0	11	N	St.N	sekisei
1	2	1	3	N	St.8	sekisei
1	3	1	3	Y	St.8	sekisei
1	2	0	4	Y	St.8	sekisei
1	3	2	11	N	St.8	sekisei
1	2	0	4	N	St.8	sekisei
1	2	2	4	N	St.8	sekisei
1	4	2	3	N	St.8	sekisei
1	2	2	3	N	St.8	sekisei
1	3	0	5	N	St.8	sekisei
1	3	1	5	N	St.8	sekisei
1	2	1	5	N	kayama	sekisei
1	2	2	6	N	kayama	sekisei
1	2	2	7	Y	kayama	sekisei
1	3	2	16	N	St.20	sekisei
1	3	2	15	N	St.20	sekisei
1	3	0	12	Y	St.20	sekisei
1	2	1	14	N	St.20	sekisei
1	3	0	14	Y	St.20	sekisei
1	3	2	14	Y	St.20	sekisei
1	2	0	13	Y	St.20	sekisei
1	3	3	11	N	St.20	sekisei
1	3	3	10	N	St.20	sekisei
1	3	2	10	Y	St.20	sekisei
1	2	3	12	N	St.20	sekisei
1	2	1	14	N	St.20	sekisei
1	3	2	15	N	St.20	sekisei
1	2	3	14	N	St.20	sekisei
1	2	1	15	Y	St.20	sekisei
1	2	2	14	N	St.20	sekisei
1	2	2	14	N	St.20	sekisei
1	2	1	14	N	St.20	sekisei
1	2	1	14	N	St.20	sekisei
1	4	1	13	Y	St.20	sekisei
1	5	0	13	N	St.20	sekisei
1	2	1	14	N	St.20	sekisei
1	2	2	14	N	St.20	sekisei
1	3	1	13	Y	St.20	sekisei
1	2	1	14	Y	St.20	sekisei
1	2	2	14	N	St.20	sekisei
1	2	2	13	Y	St.20	sekisei
1	2	1	14	Y	St.20	sekisei
1	2	0	12	Y	St.20	sekisei
1	2	1	12	N	St.20	sekisei
1	3	1	11	Y	St.18	sekisei
1	1	1	9	Y	St.18	sekisei
1	3	0	10	Y	St.18	sekisei
1	2	0	8	Y	St.18	sekisei
1	2	1	11	N	St.18	sekisei
1	2	1	5	N	St.K	sekisei
1	2	1	5	N	St.K	sekisei
1	2	0	6	Y	St.K	sekisei
1	2	1	11	N	St.K	sekisei
1	1	0	11	Y	St.K	sekisei
1	4	1	11	N	St.K	sekisei
1	2	1	1	N	St.K	sekisei
1	2	0	9	Y	St.K	sekisei
1	2	0	7	Y	St.K	sekisei
1	4	0	8	Y	St.K	sekisei
1	2	1	8	N	St.K	sekisei
1	2	1	8	N	St.K	sekisei
1	5	0	9	Y	St.K	sekisei
1	2	1	6	Y	St.K	sekisei
1	2	1	5	Y	St.K	sekisei
1	2	2	7	N	St.K	sekisei
1	1	3	6	N	St.K	sekisei
1	3	1	4	N	take	sekisei
1	2	0	4	N	take	sekisei
1	3	1	4	N	take	sekisei
1	2	1	3	N	take	sekisei
1	3	1	3	N	take	sekisei
1	3	2	3	N	take	sekisei
1	2	0	4	Y	take	sekisei
1	4	0	4	Y	take	sekisei
1	4	1	4	Y	take	sekisei
1	2	2	5	Y	take	sekisei
1	2	2	5	N	take	sekisei
1	2	1	5	N	take	sekisei
1	2	3	6	N	take	sekisei
1	2	1	5	Y	take	sekisei
1	4	1	5	Y	take	sekisei
1	2	1	5	Y	take	sekisei
1	2	0	8	Y	way	sekisei
1	1	0	8	Y	way	sekisei
1	2	1	8	N	way	sekisei
1	1	0	8	N	way	sekisei
1	1	0	8	N	way	sekisei
1	1	1	8	N	way	sekisei
1	1	1	8	N	way	sekisei
1	2	0	6	Y	sai4	sekisei
1	1	0	4	N	sai4	sekisei
1	2	0	5	Y	sai4	sekisei
1	2	1	8	Y	anaino	sekisei
1	2	2	8	N	anaino	sekisei
1	3	2	9	Y	anaino	sekisei
1	2	2	9	Y	anaino	sekisei
1	4	1	10	N	anaino	sekisei
1	4	0	10	Y	anaino	sekisei
1	2	1	7	Y	anaino	sekisei
1	2	1	8	N	anaino	sekisei
1	2	0	8	Y	anaino	sekisei
1	2	2	7	N	anaino	sekisei
1	3	1	6	N	anaino	sekisei
1	2	0	7	N	anaino	sekisei
1	1	0	7	N	anaino	sekisei
1	2	0	5	N	anaino	sekisei
1	4	0	5	N	anaino	sekisei
1	1	0	4	Y	sai3	sekisei
1	2	0	4	Y	sai3	sekisei
1	2	1	4	Y	sai3	sekisei
1	1	2	4	Y	sai3	sekisei
1	2	0	4	Y	sai3	sekisei
1	2	0	4	Y	sai3	sekisei
1	3	0	4	Y	sai3	sekisei
1	1	0	3	Y	sai3	sekisei
1	2	0	4	N	sai3	sekisei
1	2	0	10	N	uraino	sekisei
1	2	0	9	N	uraino	sekisei
1	2	0	9	N	uraino	sekisei
1	2	4	8	N	uraino	sekisei
1	3	1	5	N	anakuchi	sekisei
1	2	1	6	N	anakuchi	sekisei
1	3	1	6	N	anakuchi	sekisei
1	2	2	6	N	anakuchi	sekisei
1	3	2	7	N	anakuchi	sekisei
1	2	1	7	N	anakuchi	sekisei
1	3	0	7	Y	anakuchi	sekisei
1	2	1	7	Y	anakuchi	sekisei
1	2	2	7	Y	anakuchi	sekisei
1	3	2	7	N	anakuchi	sekisei
1	3	2	6	N	anakuchi	sekisei
1	2	0	6	Y	anakuchi	sekisei
1	3	0	6	Y	anakuchi	sekisei
1	2	2	6	N	anakuchi	sekisei
1	3	0	6	N	anakuchi	sekisei
1	2	1	6	N	anakuchi	sekisei
1	4	1	6	Y	anakuchi	sekisei
1	2	0	7	N	anakuchi	sekisei
1	3	0	7	N	anakuchi	sekisei
1	3	2	7	N	anakuchi	sekisei
1	2	1	7	N	anakuchi	sekisei
1	2	1	6	N	anakuchi	sekisei
1	2	2	6	N	anakuchi	sekisei
1	2	2	5	N	anakuchi	sekisei
1	2	0	6	Y	anakuchi	sekisei
1	2	2	7	N	anakuchi	sekisei
1	5	0	7	Y	anakuchi	sekisei
1	2	0	7	Y	anakuchi	sekisei
1	3	0	7	Y	anakuchi	sekisei
1	2	0	7	Y	anakuchi	sekisei
1	3	0	7	Y	urakuchi	sekisei
1	4	0	7	Y	urakuchi	sekisei
1	3	1	7	Y	urakuchi	sekisei
1	2	0	8	Y	urakuchi	sekisei
1	2	0	7	Y	urakuchi	sekisei
1	4	1	7	N	urakuchi	sekisei
1	1	1	7	N	urakuchi	sekisei
1	3	2	3	N	urakuchi	sekisei
1	4	0	5	Y	kataino	sekisei
1	1	2	5	N	kataino	sekisei
1	2	0	5	Y	kataino	sekisei
1	1	1	5	N	kataino	sekisei
1	2	1	5	N	kataino	sekisei
1	2	0	6	N	kataino	sekisei
1	2	1	4	N	kataino	sekisei
1	2	2	4	N	kataino	sekisei
1	1	0	4	Y	kataino	sekisei
1	2	2	5	N	kataino	sekisei
1	2	2	6	N	kataino	sekisei
1	2	1	6	N	kataino	sekisei
1	2	1	6	N	kataino	sekisei
1	2	0	6	N	kataino	sekisei
1	2	0	6	N	kataino	sekisei
1	2	1	3	Y	kataino	sekisei
1	2	0	3	Y	kataino	sekisei
1	1	0	3	Y	kataino	sekisei
1	1	1	3	N	kataino	sekisei
1	1	1	3	N	kataino	sekisei
1	1	1	3	N	kataino	sekisei
1	2	1	3	N	kataino	sekisei
1	2	1	3	N	kataino	sekisei
1	2	0	5	Y	kataino	sekisei
1	2	0	4	Y	kataino	sekisei
1	3	0	3	Y	kataino	sekisei
1	2	1	3	N	kataino	sekisei
1	2	2	3	N	kataino	sekisei
1	1	1	3	N	kataino	sekisei
1	1	0	7	Y	kataino	sekisei
1	2	0	14	Y	katakuchi	sekisei
1	1	0	13	Y	katakuchi	sekisei
1	1	0	13	Y	katakuchi	sekisei
1	1	2	11	N	katakuchi	sekisei
1	1	0	16	Y	katakuchi	sekisei
1	1	0	16	Y	katakuchi	sekisei
1	1	0	10	Y	katakuchi	sekisei
1	1	2	16	N	katakuchi	sekisei
1	1	0	10	Y	katakuchi	sekisei
1	2	0	15	Y	katakuchi	sekisei
1	1	0	14	N	katakuchi	sekisei
1	1	0	14	N	katakuchi	sekisei
1	1	0	14	Y	katakuchi	sekisei
1	1	1	14	N	katakuchi	sekisei
1	1	0	15	Y	katakuchi	sekisei
1	1	0	15	Y	katakuchi	sekisei
1	1	0	19	Y	katakuchi	sekisei
1	1	0	13	Y	katakuchi	sekisei
1	1	0	12	Y	katakuchi	sekisei
1	1	3	9	N	katakuchi	sekisei
