# Supplementary material for: Non-bleached colonies of massive Porites may attract fishes for selective grazing during mass bleaching events
Source: PeerJ. 2017 Jun 30;5:e3470. doi: 10.7717/peerj.3470 (PMC5494163; doi:10.7717/peerj.3470)
Supplement: Supplemental Information 2 [file peerj-05-3470-s002.xlsx]

## Sheet: Sheet1
No. of colony	Colony area	Scar area	Scar ratio	Degree of grazing scars
1	32318.6	5804.96	0.179617	3
2	68934.1	7910.24	0.114751	2
3	44064.6	1865.83	0.042343	1
4	18282.5	523.89	0.0286553	1
5	30795.8	183.179	0.00594817	1
6	72463.1	1347.71	0.0185986	1
7	67794.4	1035.74	0.0152777	1
8	973633	0	0	0
9	84878.8	0	0	0
10	9306.29	280.602	0.0301519	1
11	9452.15	1171.56	0.123947	2
12	32113.2	1486.89	0.0463015	1
13	32433.4	34.83	0.00107389	1
14	56081.8	2091.52	0.0372942	1
15	30742.4	1217.21	0.0395938	1
16	26998	419.636	0.0155432	1
17	16684.1	469.985	0.0281696	1
18	15785.1	1960.3	0.124187	2
19	14919.7	76.722	0.00514233	1
20	26087.3	1691.21	0.0648287	1
21	10478.8	226.111	0.0215779	1
22	26793.8	192.351	0.00717893	1
23	48991.2	0	0	0
24	31402.2	1207.84	0.0384635	1
25	43180.8	978.611	0.0226631	1
26	148586	3614.85	0.0243283	1
27	153239	15727.6	0.102635	2
28	54558.1	0	0	0
29	43528.7	68.242	0.00156775	1
30	92022.8	967.477	0.0105134	1
31	57434.9	3185.1	0.0554559	2
32	38451.4	442.873	0.0115177	1
33	41443.7	517.082	0.0124767	1
34	29053.9	3368.28	0.115932	2
35	37481.5	0	0	0
36	71876.7	1434.01	0.019951	1
37	19312.2	0	0	0
38	28347	735.327	0.0259402	1
39	33836.7	8673.19	0.256325	3
40	124572	0	0	0
41	107754	1801.31	0.0167168	1
42	63246	2013.31	0.031833	1
43	39671.8	0	0	0
44	50031.2	1514.38	0.0302687	1
45	19060.6	171.654	0.00900567	1
